# Supplementary material
Source: PubMed Central journal article supplement (PMC4841721)
Supplement: NIHMS767360-supplement-262_2016_1813_MOESM1_ESM.pdf [file NIHMS767360-supplement-262_2016_1813_MOESM1_ESM.pdf]

| Antigen | Conjugate | Clone    | Isotype              | Manufacturer      |
|---------|-----------|----------|----------------------|-------------------|
| CD3ε    | APC-Cy7   | 145-2C11 | Armenian Hamster IgG | Biolegend         |
| CD4     | FITC      | RM4-5    | Rat IgG2a            | BD Biosciences    |
| CD4     | PE        | GK1.5    | Rat IgG2b            | eBioscience       |
| CD8α    | APC       | 53-6.7   | Rat IgG2a            | eBioscience       |
| CD25    | FITC      | PC61     | Rat IgG1             | BD Biosciences    |
| FoxP3   | APC       | FJK-16s  | Rat IgG2a            | eBioscience       |
| IFN-γ   | PE        | XMG1.2   | Rat IgG1             | Tonbo Biosciences |

**Supplementary Table S1 Antibodies used in flow cytometry experiments.**

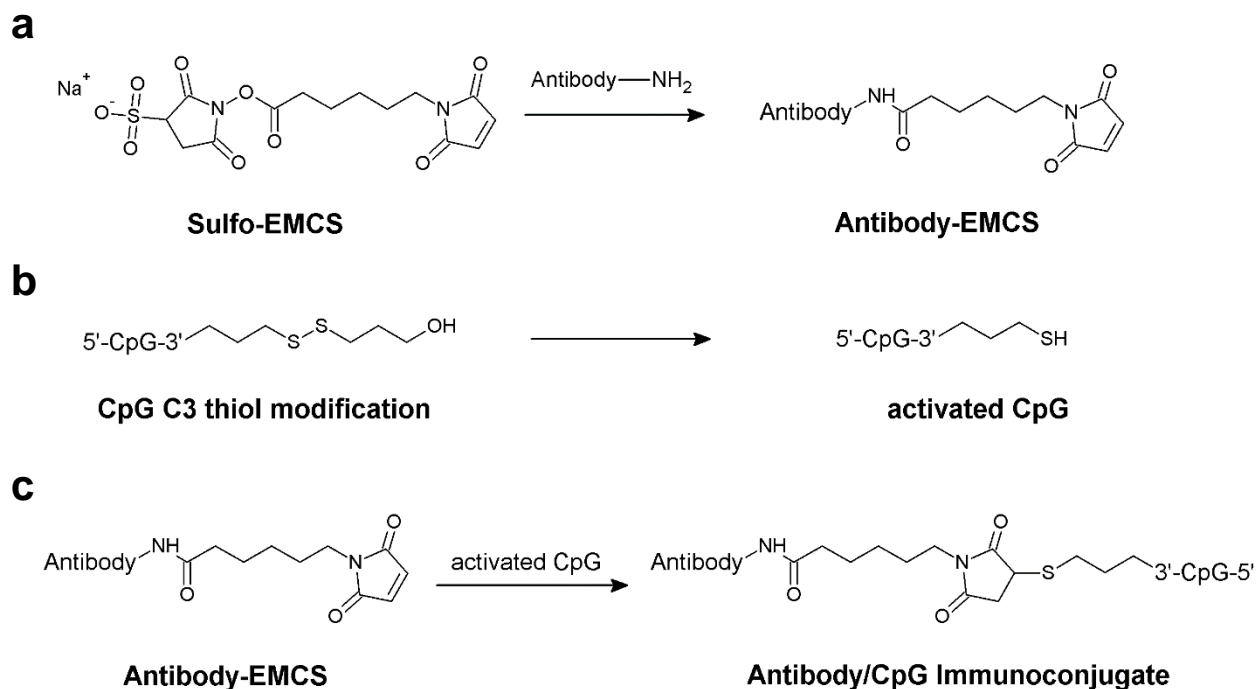

**Supplementary Figure S1 Immunoconjugation reactions for the generation of antibody/CpG. (a)** Primary amines on the antibody reacted with the NHS ester on Sulfo-EMCS. **(b)** 3'-modified CpG were reduced to yield a free sulfhydryl group. **(c)** The sulfhydryl group on CpG reacted with the maleimide group in the antibody-EMCS conjugates to form antibody/CpG.

**a**

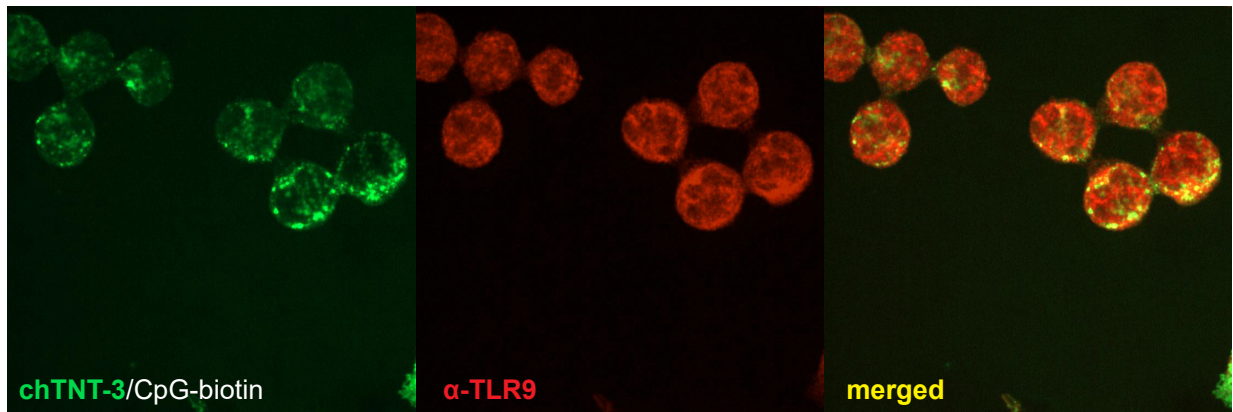

**b**

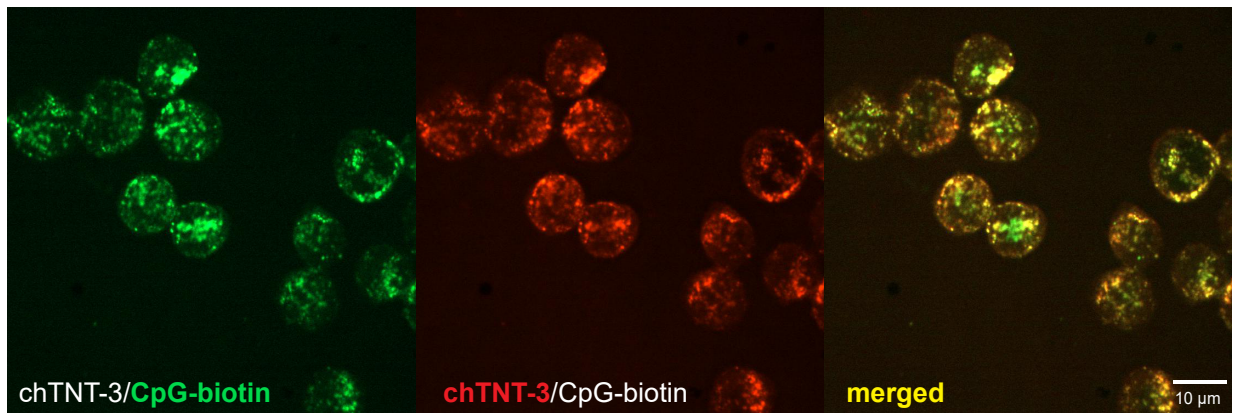

**Supplementary Figure S2 Internalization and localization of chTNT-3 moiety of chTNT-3/CpG-biotin. (a)** Fluorescent microscopy demonstrating internalization of chTNT-3-moiety and co-localization with TLR9 at 60 min. chTNT-3 was detected using  $\alpha$ -hulgG-AF488 (green). TLR9 was detected using  $\alpha$ -TLR9 and  $\alpha$ -rabbit IgG-AF568 (red). **(b)** chTNT-3 moiety stays conjugated with the CpG-biotin moiety following internalization at 60 min. CpG-biotin was detected using streptavidin-AF488 (green) and chTNT-3 was detected using  $\alpha$ -hulgG-AF568 (red).

**Supplementary Figure S2. Jang et al.**

**Supplementary Figure S3 IL-4, IL-2, IFN- $\gamma$ , and IL-17(F) release in response to CpG with and without anti-CD3 antibody *in vitro*.** Without anti-CD3 stimulation, IL-4 was undetectable. Error bars represent SEM. Black, gray, and white histograms correspond to 0.1, 1.0, and 10  $\mu$ g/mL of oligo, respectively. \* $p < 0.05$ , \*\* $p < 0.01$ , \*\*\* $p < 0.001$ , \*\*\*\* $p < 0.0001$ ,  $n = 3$ , except IL-17(F) where  $n = 2$  mice.

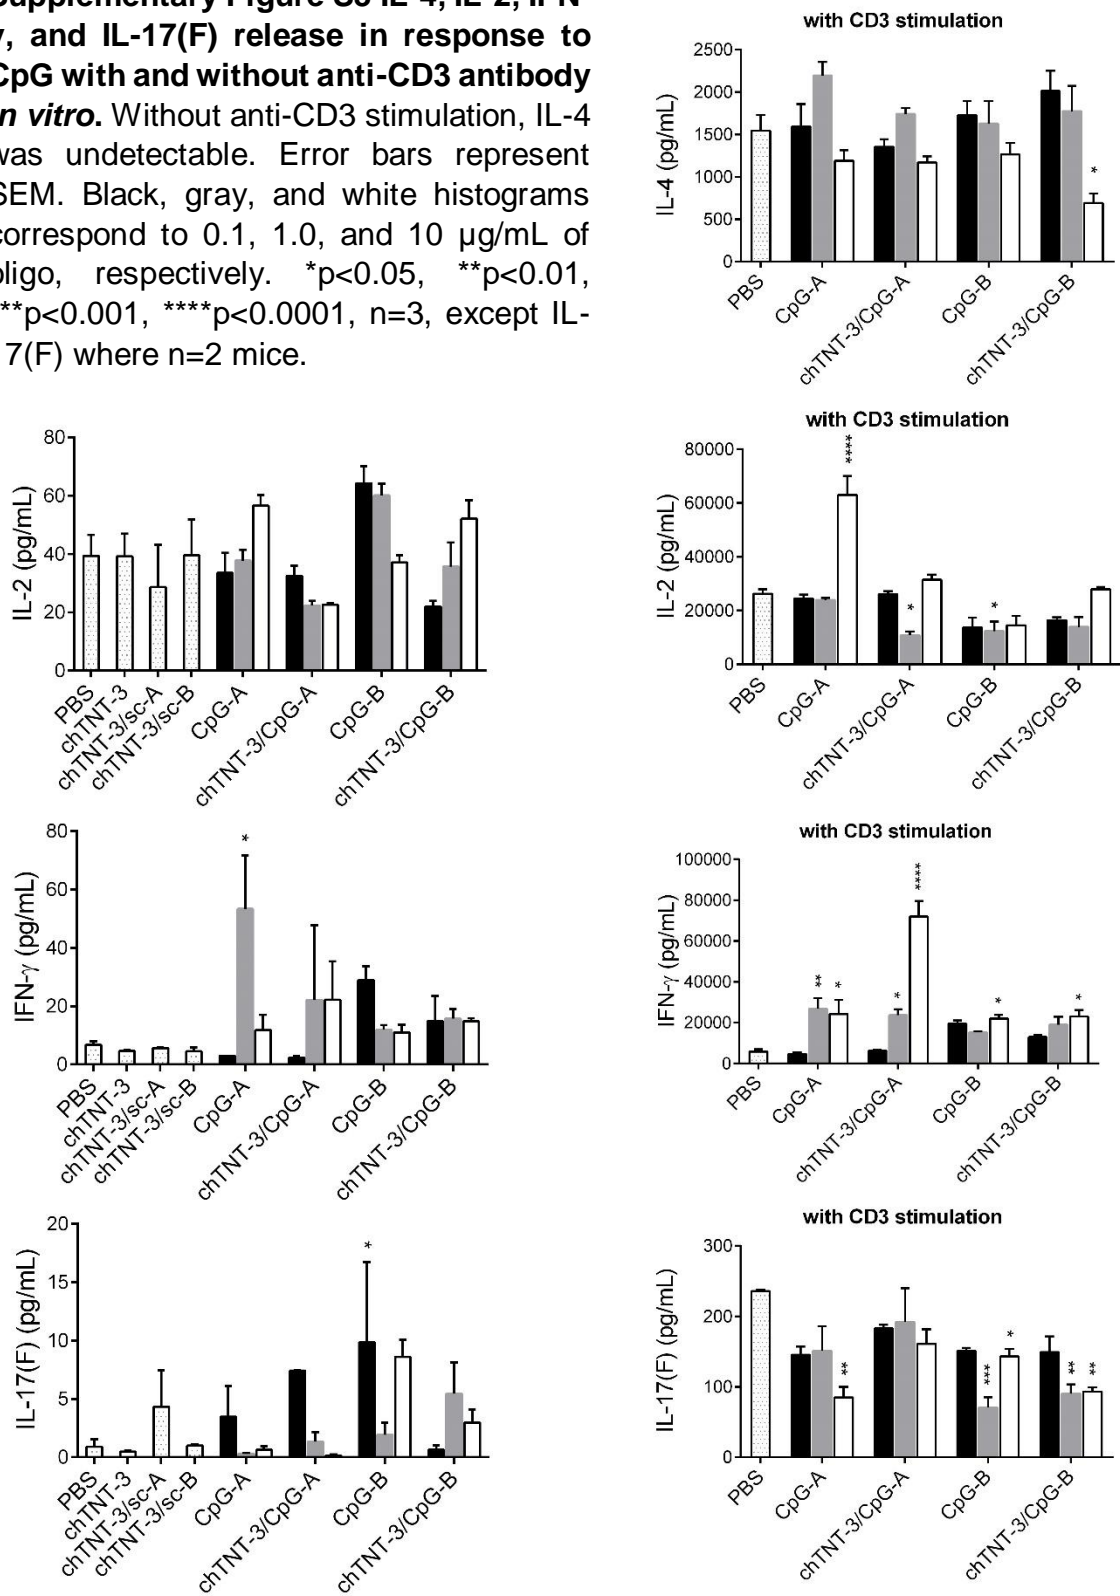

**Supplementary Figure S3. Jang et al.**

**a**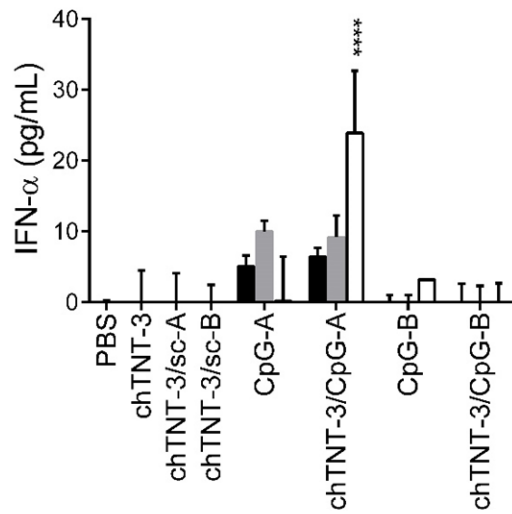**b**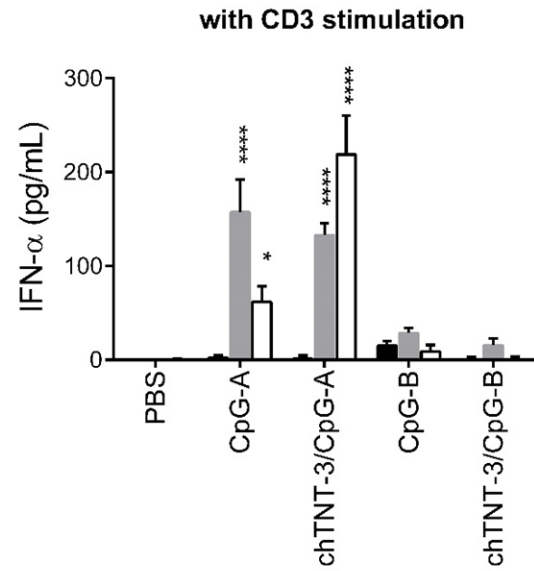

**Supplementary Figure S4 Class A CpG and its immunoconjugates induced IFN- $\alpha$  *in vitro*.** (a) Without and (b) with CD3 stimulation. Supernatants were analyzed by ELISA. \* $p < 0.05$ , \*\*\*\* $p < 0.0001$ ,  $n = 3$  mice.

**a****Colon 26**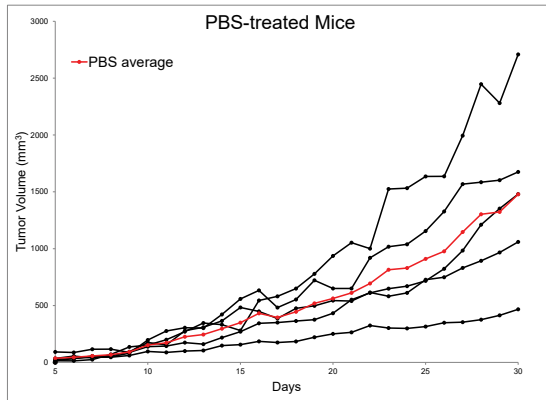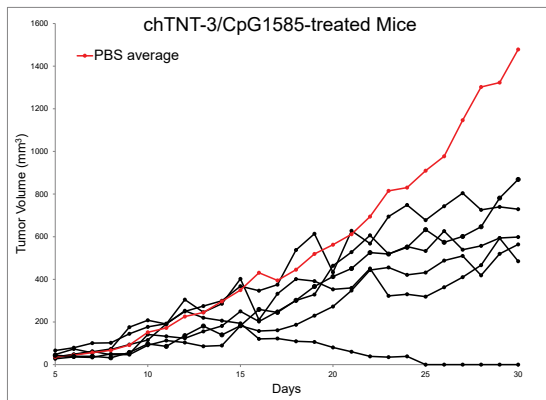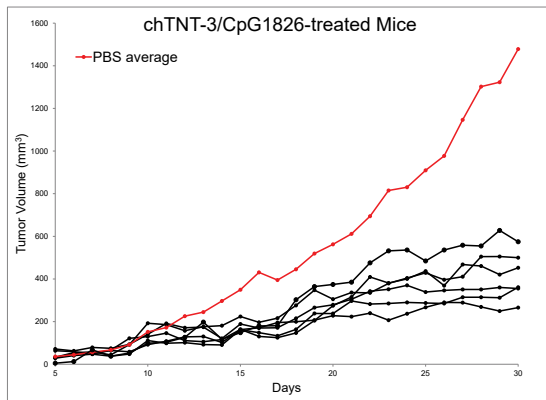**b****B16**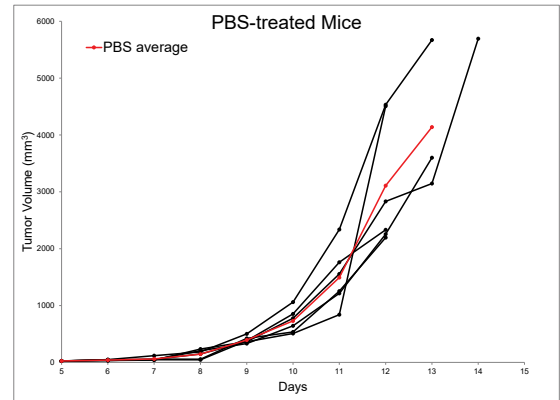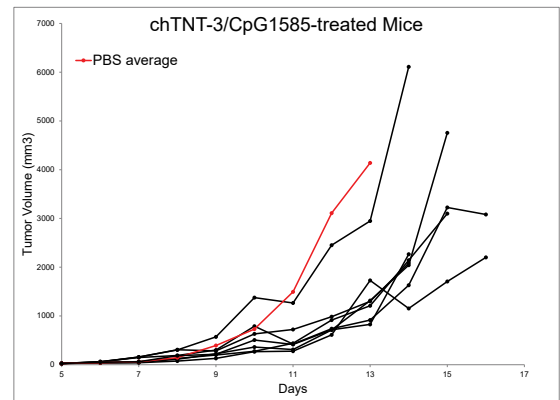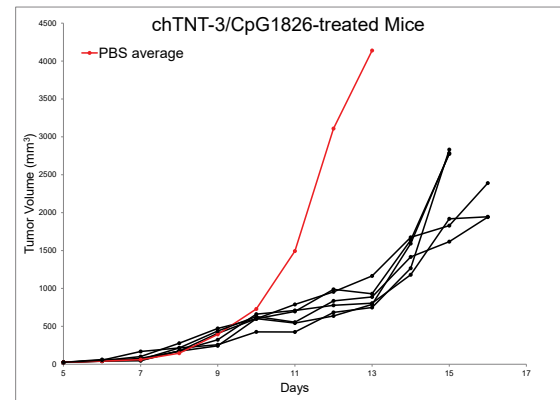

**Supplementary Figure S5 Individual tumor curves for mice treated with PBS, chTNT-3/CpG1585, and chTNT-3/CpG1826. (a) Colon 26 tumor model in BALB/c mice. (b) B16 tumor model in C57BL/6 mice.**

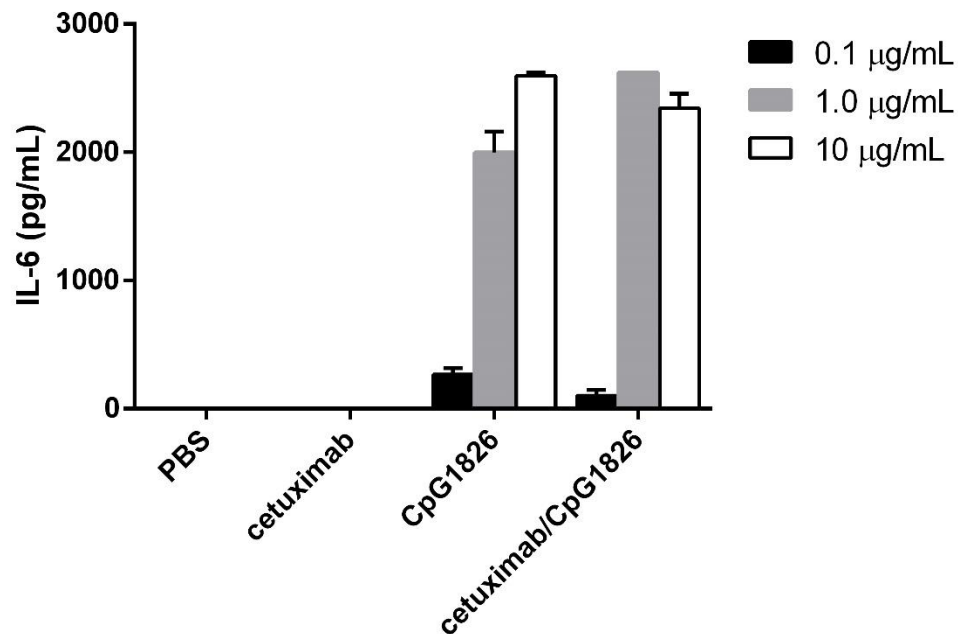

**Supplementary Figure S6 *In vitro* activity of cetuximab/CpG1826 on murine splenocytes.** Splenocytes from a naïve BALB/c female mouse were stimulated with cetuximab, CpG1826, or cetuximab/CpG1826 in low serum medium (2.5% FBS in RPMI) for four days. Concentrations of cetuximab were 0.54, 5.4, and 54 µg/mL, corresponding to 0.1, 1.0, and 10 µg/mL of CpG. IL-6 concentrations were measured in the supernatants using Mouse IL-6 Quantikine ELISA Kit (R&D, Minneapolis, MN). Error bars represent standard error of the mean of triplicate samples.
